1 Gestational pertussis vaccination and the infant's cellular immune response against  
2 whole-cell pertussis vaccine in the first year of life

3

4 Carolina Argondizo-Correia<sup>a,b,\*</sup>; Lourdes Rehder de Andrade Vaz-de-Lima<sup>b</sup>, Elaine  
5 Uchima Uehara<sup>c</sup>, Eder Gatti Fernandes<sup>d</sup>, Helena Keico Sato<sup>d</sup>, Ana Paula Sayuri Sato<sup>e</sup>,  
6 Expedito José de Albuquerque Luna<sup>a</sup>, Euclides Ayres de Castilho<sup>b</sup>, Cyro Alves de  
7 Brito<sup>a,b,#</sup>

8

9 <sup>a</sup>Institute of Tropical Medicine, University of São Paulo, São Paulo, Brazil

10 <sup>b</sup>Immunology Centre, Adolfo Lutz Institute, São Paulo, SP, Brazil

11 <sup>c</sup>Institute of Biomedical Sciences, University of São Paulo, São Paulo, Brazil

12 <sup>d</sup>CVE/CCD/SES, São Paulo, Brazil

13 <sup>e</sup>School of Public Health, University of São Paulo, São Paulo, Brazil

14

15 Running Head: Infant's pertussis cellular immune response

16

17 #Address correspondesse to Cyro Alves de Brito, [cbrito@usp.br](mailto:cbrito@usp.br)

18 \*Present address: Carolina Argondizo Correia, Laboratory of Medical Investigation 60,

19 Medical School, University of São Paulo.

20

21 Word count (abstract): 249 words

22

23 Word count (text): 2735 words

24

## 25    **Abstract**

26    Pertussis resurgence worldwide calls for new prevention strategies, as the recently  
 27    incorporated vaccine booster dose during pregnancy, whose aim is to protect newborns  
 28    from infection. In Brazil, maternal Tdap vaccination is recommended since 2014, and  
 29    we reported that this strategy promotes high transplacental transfer of anti-PT IgG and it  
 30    is effective in protecting infants early in life. Young children are the most susceptible  
 31    group and with higher mortality rates, however, it is not well known whether the  
 32    elicited anti-pertussis maternal antibodies could influence in the children's immune  
 33    responses further in life, especially after their own vaccination against pertussis.  
 34    Considering this scenario, we conducted a study with children born to mothers who  
 35    either received or not the booster dose during pregnancy, after their primary pertussis  
 36    vaccination, in order to investigate the first impact of maternal immunisation on the  
 37    response to infant immunisation regarding the cellular immune response, while  
 38    comparing with data from the literature.

39    As transfer of maternal antibodies could result in attenuation of the immune response to  
 40    vaccination in infants, this study performed to determine whether higher levels of  
 41    maternal antibodies could influence in the immune response of infants to the whole-  
 42    pertussis vaccination series. Results showed no difference in cytokine production  
 43    between groups, a first suggestion that maternal vaccination may not interfere with  
 44    recognition and cellular response generation to vaccination. This data, together with  
 45    humoral immunity and epidemiological studies, is important for the implementation of  
 46    maternal immunisation strategies nationwide and will contribute to assure public  
 47    policies regarding vaccination schemes.

48

49 **Importance:** Pertussis, or whooping cough, is a respiratory infectious disease caused by  
 50 a bacterial agent, resulting in violent coughs and possibly death in vulnerable groups,  
 51 such as young children and neonates. It is known that pregnant mothers transfer  
 52 antibodies to their developing foetuses for protection in early life, however anti-  
 53 pertussis antibodies are not highly detected in young children. Thus, a pertussis  
 54 maternal vaccination was implemented to increase maternal anti-pertussis antibodies  
 55 levels in pregnant women and therefore the transference to the foetus. However,  
 56 maternal antibodies can also interfere in the child immune response in the first months  
 57 of life. The significance of our research is in analysing the cellular immune response of  
 58 children born from pertussis-vaccinated mothers, which will give a first glimpse on how  
 59 maternal antibodies could modulate the child's response to pertussis in early life.

60

## 61 **Introduction**

62 Pertussis is a contagious respiratory disease caused by the *Bordetella pertussis* bacteria  
 63 [1]. Despite high vaccination coverage, it remains an important public health problem,  
 64 re-emerging in several countries every several years [2,3]. It has a high rate of  
 65 morbimortality in young children, and estimates from the World Health Organization  
 66 suggest that ~50 million pertussis cases and 300,000 deaths occurred annually, mostly  
 67 in children under five years of age [4]. In Brazil, between 2010 and 2014, over 22,000  
 68 people were infected [5], most cases in children younger than 1 year of age [5,6].

69 The current childhood vaccination schedule includes three doses of the diphtheria,  
 70 tetanus and whole cell pertussis vaccine, combined with *Haemophilus influenza* b and  
 71 hepatitis B (DTwP-Hib-HBV) in the first year of life, at 8, 16 and 24 weeks of age,  
 72 leaving neonates without specific protection. So, a dose of tetanus, reduced diphtheria  
 73 and acellular pertussis vaccine (Tdap) during pregnancy was proposed to address this

immunity gap in young infants and promote a higher transplacental transfer of maternal antipertussis antibodies (MatAb) to the foetus, resulting in improved protection during the neonatal period and until their own vaccination scheme is completed [7].

Since 2012, this has been recommended in the United States, United Kingdom and Australia [8], and since November 2014 in Brazil [9]. Recently, we have shown Tdap maternal vaccination promotes high titers of anti-PT IgG in newborn [10], also this strategy showed a vaccine effectiveness of 82.6% in protecting infants aged <8 weeks from pertussis in Brazil [11]. However, until now, little is known whether it may affect the subsequent childhood vaccination, which uses whole-cell pertussis (wP) [12], while other countries recommend the acellular pertussis (aP) version [13]. There is also a concern that in addition to promoting protection to young infants, high MatAb titres could interfere or attenuate the immune response to the primary childhood pertussis vaccination series [14–16].

The humoral response is not the only responsible for the protection against infection, as well as there are no correlates of protection for serological levels of antipertussis antibodies [17]. Several studies show that the cellular immune response is required for effective clearance of infection from the respiratory tract and disease prevention, through effector mechanisms mediated by IFN- $\gamma$  and IL-2, which are mostly produced by the T helper lymphocyte 1 (Th1). This cell type is described as having a more inflammatory profile, opposed to Th2 cells, characterized by the production of IL-4, IL-5 and IL-13. Some authors also relate the presence of IL-17 in the mechanism against *B. pertussis in vivo*, a cytokine produced by Th17 cells [18–23].

In light of this information, we sought to analyse the production of effector cytokines that could imply the activation of the infants' cellular immune response against *B.*

98 *pertussis* antigen *in vitro*, in the context of the presence of maternal anti-pertussis  
99 antibodies.

100

## 101 **Material and Methods**

### 102 *Study Design and Participants*

103 This study included 43 children around 7 months of age, born either to mothers  
104 vaccinated during pregnancy with a Tdap boost vaccine during the third trimester of  
105 pregnancy (n=33) or mothers who did not get vaccinated (n=10). This cohort is derived  
106 from a larger cohort described elsewhere [10]. Mothers were followed up after  
107 parturition until their children received the primary pertussis vaccination series,  
108 composed by three DTwP-Hib-HBV doses (produced by Bio-Manguinhos/Fiocruz), at  
109 approximately 2, 4 and 6 months of age. The protocol was approved by the Ethics  
110 Committee from the Adolfo Lutz Institute (CAAE: 37581114.0.0000.0059).

111

### 112 *Sample Processing and In Vitro Stimulation*

113 5 mL of heparinized venous peripheral blood samples were collected by nurses from  
114 young children around one month after the third DTwP dose.

115 Samples were diluted in culture medium (RPMI 1640 [Gibco, Massachusetts/USA]  
116 supplemented with 2 g of NaHCO<sub>3</sub>, 10 mL of nonessential amino acids [Gibco], 40 mg  
117 of gentamycin and 10 mL of 200 mM L-glutamine [Sigma, Missouri/USA]). Peripheral  
118 blood mononuclear cells (PBMC) were isolated using a Ficoll-Paque Plus 1440 gradient  
119 (GE Healthcare, Uppsala/Sweden), according to the manufacturer's instructions. Cells  
120 were washed and resuspended in culture medium, counted and rested overnight (~16 h,  
121 1x10<sup>6</sup> cells/mL) in 48-well flat-bottom plates at 37°C in a 5% CO<sub>2</sub> incubator. On the  
122 following day, cells were stimulated with 2 µg/mL phytohemagglutinin (PHA) for 48 h

123 [Sigma, Missouri/USA] or 5 µg/mL of inactivated pertussis toxoid (PT) for 120 h. After  
124 culture, cells and supernatant were collected and stored at -80°C for later assays. Cell  
125 pellets were stabilized using RNeasy Lysis Buffer (Qiagen) and phosphate buffered saline (21.02 g  
126 of Na<sub>2</sub>HPO<sub>4</sub>, 7.16 g of NaH<sub>2</sub>PO<sub>4</sub>·H<sub>2</sub>O, 164.64 g of NaCl and reverse-osmosis H<sub>2</sub>O for 1  
127 L) until total RNA extraction.

128

### 129 *Cytokine Detection*

130 Frozen supernatants were thawed at room temperature, and cytokines were measured  
131 using both *Cytometric Bead Array Th1/Th2/Th17* kit (BD Biosciences, New  
132 Jersey/USA) and *LEGENDplex Human Th Cytokine Panel (13-plex)* kit (BioLegend,  
133 California/USA), according to the manufacturers' instructions, in order to compare  
134 results and analyse a larger range of cytokines. Both curve and samples were read in a  
135 BD LSRFortessa flow cytometer (BD Biosciences). Minimum detection limits were  
136 4.88 pg/mL (BD) and 2.4 pg/mL (BioLegend). Corresponding analyses were performed  
137 with FCAP Array software v3.0 (BD Biosciences) and LEGENDplex Data Analysis  
138 software (BioLegend).

139

### 140 *RNA Extraction and Quantitative Polymerase Chain Reaction (qPCR)*

141 RNA extraction was performed using Qiagen's RNeasy Mini kit (Qiagen,  
142 Hilden/Germany), following the manufacturer's instructions. To remove any traces of  
143 DNA, a DNA digestion step was performed using an RNAqueous Mini Kit (Ambion,  
144 Massachusetts/USA). RNA purity and quantity were evaluated by spectrophotometry in  
145 a Nanodrop (Thermo Scientific, Massachusetts/USA). RNA was reverse transcribed to  
146 cDNA using an iScript cDNA Synthesis Kit (Bio-Rad, California/USA) according to  
147 the manufacturer's instructions.

In an attempt to identify different cell types, the chosen genes were the transcription factor *RORC2* and the cytokine gene *IL17A*, representing Th17 cells, the transcription factor *GATA3* and the cytokine gene *IL4* representing Th2 cells, and the cytokines *IFNG* for Th1 and *IL10* for regulatory response [24]. qPCR assays were run for each sample containing cDNA as a template, specific forward (5'-3') and reverse (5'-3') primers, respectively:

*RORC2*: TGG AAG TGG TGG TTAGGA/AAG GCT CGG AACAGCTCCAT;

*GATA3*: AGATGGCACGGGACACTACCT/TAATTCGGGTTCGCTTCCG;

*IFNG*:

GTTTTGGGTTCCTTGGCTGTTA/AAAAGAGTTCCATTATGCGCTACATC;

*IL17A*: GACTCCTGGGAAGACCTCATTGG/CTTGTCTCAGAATTTGGGCATCC;

*IL4*: ACAGCCTCACAGAGCAGAAGACT/TGTTCTTGGAGGCAGCAAAGA;

*IL10*: CAGGGCACCCAGTCTGAGAA/CACATGCGCCTTGATGTCTG;

*GAPDH*: GAAGGTGAAGGTCGGAGT/GAAGATGGTGATGGGATTTCCTCA;

and SYBR Green PCR Master Mix (Life Technologies, Massachusetts/USA) on an Applied Biosystems 7500 Real-Time PCR System (Applied Biosystems, California/USA). *GAPDH* gene expression was used as a control to normalize the data. Results were represented as fold change given by the equation described by Livak and Schmittgen [25].

# *Statistical Analysis*

Descriptive and inferential statistical analyses were performed with GraphPad Prism software (version 5.0). Nonparametric Mann-Whitney, Kruskal-Wallis, Friedman, Dunn and Wilcoxon tests were used for inter- and intragroup analyses, and Spearman's

172 correlation coefficient was used for demographic and experimental data. We used  
173  $\alpha=5\%$ , 95% confidence interval, level of significance=5% and 2-sided tests.

174

## 175 **Results**

176 The study population consisted of young children born from women who received (VC)  
177 or not (NVC) a Tdap boost dose during pregnancy (Table 1). Samples were randomly  
178 chosen from a larger cohort described by Vaz-de-Lima et al. [10]. The groups presented  
179 a similar and representative demographic profile when compared to the larger cohort.

180 In order to evaluate whether Tdap vaccination during pregnancy could induce  
181 modification in the cellular immune response of children, we evaluated a few related  
182 genes and cytokines that could represent the main cells in the cellular immune response,  
183 herein described as Th1, Th2 and Th17.

184 Transcriptional profile (Figure 1) showed no difference between groups, though the  
185 median levels of *GATA3*, *IL10* and *IFNG* were higher in children born to nonvaccinated  
186 mothers. When comparing the normalized expression of both basal and stimulated  
187 condition between groups, NVCs had lower levels for the basal condition concerning  
188 *GATA3* ( $p=0.0279$ ) and *IFNG* ( $p=0.0290$ ) expression. In the stimulated condition, the  
189 differences disappear, so the higher median level in the fold change analysis can  
190 indicate that in order to achieve the same expression upon PT stimulation, NVCs must  
191 have a greater increase in the expression of *GATA3* and *IFNG* due to the lower basal  
192 expression.

193 To verify whether the results found in gene expression reflected the cytokine  
194 production, cytokines from Th1, Th2 and Th17 profiles were quantified via flow  
195 cytometry (Table 2). PHA stimulation was used as a positive control in a few samples  
196 for the main cytokines for the 3 Th profiles, due to samples and kit availability.

197 In Table 2 it shown the total quantification from detectable all cytokines but IL-9 and  
198 IL-17F, as those values were undetectable.

199 Overall, TNF, IFN- $\gamma$ , IL-13 and IL-6 were the most produced cytokines in both groups,  
200 with IL-6 being more produced in PT-stimulated cells derived from children born to  
201 vaccinated mothers (VC). In contrast, IL-2 was higher is children whose mothers were  
202 not vaccinated (NVC).

203 As both groups showed simultaneous IFN- $\gamma$  and IL-13 production, which could indicate  
204 a mixed Th1/Th2 response or a good response by individuals to all cytokines, we  
205 evaluated the correlation between cytokines from different profiles, looking for a  
206 predominant response in all individuals or whether some individuals were indistinctly  
207 good responders to all T helper cell profiles (data not shown). However, no correlation  
208 was found between groups or cytokines. Individual responses were different from each  
209 other, making it challenging to find a correlation in a small group.

210 Regarding infants with higher cytokine levels, we analysed whether factors such as  
211 Tdap dose, gestational age, route of birth, infant's sex, period of DTwP vaccination and  
212 exclusive breastfeeding could influence the response deviation (data not shown), but no  
213 significant correlations were found.

214

## 215 **Discussion**

216 This study was the first to show the cellular immune response in older children, after the  
217 primary pertussis vaccination series, born to Tdap-vaccinated mothers in Brazil. Despite  
218 the use of Tdap during pregnancy was implemented in Brazil and other countries in the  
219 last few years and substantial data regarding antibody transfer and its influence on  
220 children's humoral response to vaccination [10,26–28], little is known whether this  
221 strategy could affect the infant's cellular immune response.

222 A few studies have been published recently about the influence of maternal antibodies  
223 in the neonatal humoral response, as the study made by Ibrahim et al. [29]. Women that  
224 did not receive Tdap during pregnancy but had detectable pertussis antibody levels  
225 showed that maternal antibody titres at delivery did not blunt infant vaccine response  
226 among children that receive at least 2 wP doses, and the authors observed that infant  
227 antibody titres increased with increasing maternal antibody levels against all pertussis  
228 antigens. A Brazilian study found that Tdap maternal immunization yielded  
229 significantly higher anti-PT IgG levels in vaccinated mothers and their infants compared  
230 to their unvaccinated counterparts and a strong positive correlation between the anti-PT  
231 IgG levels in maternal and cord blood at delivery, but did not look for antibodies against  
232 other pertussis antigens [10].

233 Lima et al. [28] showed the same correlation regarding antibodies against other bacterial  
234 antigens, and showed for the first time the analysis of the cellular immune response in  
235 whole cord blood cells, showing IFN- $\gamma$ , IL-6, IL-10 and TNF production by neonatal  
236 cells upon stimulation with the whole inactivated *B. pertussis*, and low levels of IL-2,  
237 IL-4 and IL-17A.

238 In our study, we complemented the neonatal data by evaluating the cytokine  
239 productions in older children, with the complete primary series of vaccination against  
240 pertussis. The cytokines analysed were TNF- $\alpha$  and IL-2, which belong to a Th1 profile,  
241 in association with IFN- $\gamma$ ; IL-9 by Th9 cells, IL-4, IL-5 and IL-13, which contribute to  
242 the Th2 response profile; IL-10 is secreted by T regulatory cells and IL-17A, IL-17F,  
243 IL-21 and IL-22 secreted by Th17 cells. IL-6 is an inflammatory cytokine and is  
244 important in the differentiation of Th17 cells [24].

245 We used purified PBMC stimulated with PT, for five days, as described in the literature  
246 [30]. By using PBMCs it easier to access lymphocytes present in the samples and PT is

247 the only specific antigen of *B. pertussis* [31], so our group decided to first run the assays  
248 with this antigen to have a first glimpse of what could have been happening, as well as,  
249 with PT, we analysed the adaptive response directly related to this stimulation. We  
250 could not determine the purity of PT used in the assays, but even with other bacterial  
251 antigens present we could see cytokine production upon stimulus.

252 Despite using samples from older children, our study agrees with Lima et al. [28] in the  
253 production of IFN- $\gamma$ , IL-6 and TNF, which we found elevated in infants' samples, but  
254 not IL-10. We also found low levels of IL-4 and IL-17A, but IL-13, which is an  
255 indicative of the Th2 response and was not available in the assay the authors performed,  
256 was found elevated in our samples. In all cytokines evaluated, there was one or more  
257 individuals that we did not detect any production, indicating a strong variability  
258 amongst human samples.

259 As our both groups presented similar characteristics, the slight difference in gene  
260 expression could suggest modulation by vaccination. Even so, samples were limited,  
261 and the mRNA analysed was just to have a glimpse of what cells populations may have  
262 been present upon stimulus. Even though cytokine mRNA are produced earlier under  
263 these experimental conditions, the presence of the genes can show a tendency to a  
264 certain profile. This is seen in both the cytokine measurement and gene expression and  
265 could be complemented by the analysis of *TBX21*, the gene responsible for Th1 cell  
266 polarization [32].

267 When attempting to find correlation between different cytokines production, we found  
268 that in both groups every individual produced high levels of at least one cytokine. In the  
269 NVC group, a correlation between IFN- $\gamma$  and IL-10 could point to a balance between  
270 activation and regulation, while in the VC group the same correlation was found, as  
271 well as between and IFN- $\gamma$  and IL-13 (data not shown). This could indicate a mixed

272 Th1/Th2 profile, with IL-10 possibly balancing the production of IFN- $\gamma$  and the  
 273 activation of Th1 cells. In both groups, cytokine levels were variable between  
 274 individuals, and thus, it is not possible to determine a predominant response pattern.  
 275 According to Li *et al.* [33], Th2 cells do not prevent Th1 polarization but induce their  
 276 apoptosis. In addition, they also observed that IL-10 could promote Th1 cell anergy  
 277 through negative regulation of accessory molecules or IL-12 in antigen-presenting cells.  
 278 Even inducing protection, maternal antibodies can also interfere with the child's vaccine  
 279 response, reducing the vaccine efficiency [34], leading to a decrease in the child's  
 280 antibody production via immune complex formation, antigen elimination via  
 281 phagocytosis or epitope masking [35]. However, immune cellular response appears to  
 282 be unaffected by these mechanisms [26]. As in Brazil children are vaccinated with  
 283 DTwP, unlike many countries, we aimed to analyse the cellular immune response of  
 284 vaccinated children born to either vaccinated or non vaccinated women, to confirm  
 285 whether the cellular response would be intact. No difference was found between the two  
 286 groups. Regardless of the different sample sizes and individual variabilities, both  
 287 common factors in human vaccine studies [36–38], we could see IFN- $\gamma$  and TNF- $\alpha$   
 288 production, indicative of the Th1 response, while only IL-13 from the Th2 profile was  
 289 detected.

290 Overall, this work is the first step towards a complete scenario of maternal antibodies  
 291 interference in cellular immune responses. Most pertussis studies describe humoral  
 292 responses, before [39] and after the implementation of maternal vaccination [40,41],  
 293 evaluating immunoglobulin levels produced by mothers and transferred to newborns, in  
 294 countries using aP vaccines in children, unlike Brazil. A paper in Argentina describes  
 295 the use of DTwP in children in the country; however, the study shows only the  
 296 influence of maternal antibodies on the humoral responses of children before DTwP

297 vaccination [41]. Despite the limitations, we evidenced cellular immune response in the  
 298 context of pertussis vaccination, which is shown to be important for protection [42]. Our  
 299 results show no difference in cytokine production against a bacterial antigen between  
 300 groups, regardless of maternal vaccination, and this could set the path to other works  
 301 that will support public health policies regarding vaccination in pregnancy. This  
 302 knowledge is essential to the enhancement of vaccine protocols in pregnant women and  
 303 as a basis for physicians and healthcare managers to recommend this strategy.

304

## 305 **Conclusion**

306 This work shows cytokine production against a pertussis antigen in the context of  
 307 maternal antibodies, and data could be strengthened by verifying these observations  
 308 with more than one pertussis antigens. Also, there are ongoing studies that measured  
 309 antibody responses to infant immunisation, in order to complement data and promote  
 310 discussion about a potential difference in the impact of maternal immunisation of infant  
 311 cellular and humoral responses.

312

313 **Acknowledgments:** The authors would like to thank the teams at Hospital Maternidade  
 314 Interlagos and Hospital Maternidade Leonor Mendes de Barros for recruitment and their  
 315 help with blood specimen collection, Laboratory of Dermatology and  
 316 Immunodeficiencies (LIM-56, Medical School of the University of São Paulo) and  
 317 Immunology Centre from the Adolfo Lutz Institute for the infrastructure and support,  
 318 the funding sources and all participants of the study. This study was supported by  
 319 funding provided by the Special Health Fund for Mass Immunization and Disease  
 320 Control (FESIMA) and São Paulo Research Foundation (FAPESP), grants  
 321 #2015/19726-7 and #2015/16157-1. The funders had no role in study design, data

322 collection and interpretation, or the decision to submit the work for publication. The  
323 authors also declare no conflicts of interest to disclose.

324

## 325 **References**

- 326 [1] World Health Organization. Pertussis vaccines: WHO position paper -  
327 August 2015. *Weely Epidemiol Rec* 2015;90:433–60. doi:10.1371/jour.
- 328 [2] Pan American Health Organization. Epidemiological alert. Pertussis (Whooping  
329 Cough). *PAHO Bull* 2012;1–2.
- 330 [3] Luz PM, Codeço CT, Werneck GL. A reemergência da coqueluche em países  
331 desenvolvidos: um problema também para o Brasil? *Cad Saúde Pública*  
332 2003;19:1209–13.
- 333 [4] World Health Organization. WHO–recommended standards for surveillance of  
334 selected vaccine-preventable diseases. Geneva: 2003.
- 335 [5] Secretaria de Vigilância em Saúde, Ministério da Saúde. Coqueluche no Brasil:  
336 análise da situação epidemiológica de 2010 a 2014. *Bol Epidemiológico*  
337 2015;46:1–8.
- 338 [6] Rocha EL, Leite D, Camargo CH, Martins LM, Silva RSN, Martins VP, et al.  
339 The characterization of *Bordetella pertussis* strains isolated in the Central-  
340 Western region of Brazil suggests the selection of a specific genetic profile  
341 during 2012–2014 outbreaks. *Epidemiol Infect* 2017;145:1392–7.  
342 doi:10.1017/S0950268816003332.
- 343 [7] Loch C, Mielcarek N. New pertussis vaccination approaches: En route to protect  
344 newborns? *FEMS Immunol Med Microbiol* 2012;66:121–33. doi:10.1111/j.1574-  
345 695X.2012.00988.x.
- 346 [8] Centers for Disease Control and Prevention. Updated Recommendations for Use

- 347 of Tetanus Toxoid, Reduced Diphtheria Toxoid, and Acellular Pertussis Vaccine  
348 (Tdap) in Pregnant Women — Advisory Committee on Immunization Practices  
349 (ACIP), 2012. Morb Mortal Wkly Rep 2013.
- 350 [9] Ministério da Saúde. Nota informativa sobre mudanças no calendário nacional de  
351 vacinação para o ano de 2017. Brasília: 2016.
- 352 [10] Vaz-de-Lima LRA, Sato HK, Fernandes EG, Sato APS, Pawloski LC, Tondella  
353 ML, et al. Association between the timing of maternal vaccination and newborns'  
354 anti-pertussis toxin antibody levels. Vaccine 2019.  
355 doi:10.1016/j.vaccine.2019.04.079.
- 356 [11] Fernandes EG, Sato APS, Vaz-de-Lima LRA, Rodrigues M, Leite D, de Brito  
357 CA, et al. The effectiveness of maternal pertussis vaccination in protecting  
358 newborn infants in Brazil: A case-control study. Vaccine 2019.  
359 doi:10.1016/j.vaccine.2019.03.049.
- 360 [12] Domingues CMAS, Teixeira AM da S. Coberturas vacinais e doenças  
361 imunopreveníveis no Brasil no período 1982-2012: avanços e desafios do  
362 Programa Nacional de Imunizações. Epidemiol e Serviços Saúde 2013;22:9–27.  
363 doi:10.5123/S1679-49742013000100002.
- 364 [13] Noble GRGR, Bernier RHRH, Esber ECEC, Hardegree MCC, Hinman ARAR,  
365 Klein D, et al. Acellular and whole-cell pertussis vaccines in Japan. Report of a  
366 visit by US scientists. JAMA 1987;257:1351–6.  
367 doi:10.1001/jama.1987.03390100089032.
- 368 [14] Osborn JJ, Dancis J, Julia JF. Studies of the immunology of the newborn infant.  
369 Pediatrics 1952;10:339–45.
- 370 [15] Premenko-Lanier M, Hodge G, Rota P, Tamin A, Bellini W, McChesney M.  
371 Maternal antibody inhibits both cellular and humoral immunity in response to

- 372       measles       vaccination       at       birth.       Virology       2006;350:429–32.  
373       doi:10.1016/j.virol.2006.02.029.
- 374   [16]   Gall   SA,   Myers   J,   Pichichero   M.   Maternal   immunization   with  
375       tetanusdiphtheriapertussis   vaccine:   Effect   on   maternal   and   neonatal   serum  
376       antibody   levels.   Am   J   Obstet   Gynecol   2011;204:334.e1-334.e5.  
377       doi:10.1016/j.ajog.2010.11.024.
- 378   [17]   Cherry JD, Gornbein J, Heininger U, Stehr K. A search for serologic correlates of  
379       immunity to Bordetella pertussis cough illnesses. Vaccine 1998;16:1901–6.  
380       doi:10.1016/S0264-410X(98)00226-6.
- 381   [18]   Mahon BBP, Sheahan BJ, Griffin F, Murphy G, Mills KHG. of Mice with  
382       Targeted Disruptions of Interferon-  $\gamma$  Receptor 1997;186.
- 383   [19]   Ross PJ, Sutton CE, Higgins S, Allen AC, Walsh K, Misiak A, et al. Relative  
384       contribution of Th1 and Th17 cells in adaptive immunity to Bordetella pertussis:  
385       towards the rational design of an improved acellular pertussis vaccine. PLoS  
386       Pathog 2013;9:e1003264. doi:10.1371/journal.ppat.1003264.
- 387   [20]   Barbic J, Leef MF, Burns DL, Shahin RD. Role of gamma interferon in natural  
388       clearance of Bordetella pertussis infection. Infect Immun 1997;65:4904–8.  
389       doi:10.1371/journal.ppat.1003264.
- 390   [21]   Ryan M, Murphy G, Gothefors L, Nilsson L, Storsaeter J, Mills KH. Bordetella  
391       pertussis respiratory infection in children is associated with preferential  
392       activation of type 1 T helper cells. J Infect Dis 1997;175:1246–50.  
393       doi:10.1086/593682.
- 394   [22]   Higgs R, Higgins SC, Ross PJ, Mills KHG. Immunity to the respiratory pathogen  
395       Bordetella pertussis. Mucosal Immunol 2012;5:485–500.  
396       doi:10.1038/mi.2012.54.

- 397 [23] Mills KHG. Immunity to Bordetella pertussis. *Microbes Infect* 2001;3:655–77.
- 398 [24] Raphael I, Nalawade S, Eagar TN, Forsthuber TG. T cell subsets and their  
399 signature cytokines in autoimmune and inflammatory diseases. *Cytokine*  
400 2015;74:5–17. doi:10.1016/j.cyto.2014.09.011.
- 401 [25] Livak KJ, Schmittgen TD. Analysis of Relative Gene Expression Data Using  
402 Real-Time Quantitative PCR and the 2– $\Delta\Delta$ CT Method. *Methods* 2001;25:402–8.  
403 doi:10.1006/meth.2001.1262.
- 404 [26] Siegrist C-A, Barrios C, Martinez X, Brandt C, Berney M, Córdova M, et al.  
405 Influence of maternal antibodies on vaccine responses: inhibition of antibody but  
406 not T cell responses allows successful early prime-boost strategies in mice. *Eur J*  
407 *Immunol* 1998;28:4138–48. doi:10.1002/(SICI)1521-4141(199812)28.
- 408 [27] Siegrist CA, Córdova M, Brandt C, Barrios C, Berney M, Tougne C, et al.  
409 Determinants of infant responses to vaccines in presence of maternal antibodies.  
410 *Vaccine* 1998;16:1409–14. doi:10.1016/S0264-410X(98)00100-5.
- 411 [28] Lima L, Molina M da GF, Pereira BS, Nadaf MLA, Nadaf MIV, Takano OA, et  
412 al. Acquisition of specific antibodies and their influence on cell-mediated  
413 immune response in neonatal cord blood after maternal pertussis vaccination  
414 during pregnancy. *Vaccine* 2019;37:2569–79.  
415 doi:10.1016/j.vaccine.2019.03.070.
- 416 [29] Ibrahim R, Ali SA, Kazi AM, Rizvi A, Guterman LB, Bednarczyk RA, et al.  
417 Impact of maternally derived pertussis antibody titers on infant whole-cell  
418 pertussis vaccine response in a low income setting. *Vaccine* 2018;36:7048–53.  
419 doi:10.1016/j.vaccine.2018.09.045.
- 420 [30] Palazzo R, Carollo M, Bianco M, Fedele G, Schiavoni I, Pandolfi E, et al.  
421 Persistence of T-cell immune response induced by two acellular pertussis

- 422 vaccines in children five years after primary vaccination. *New Microbiol*  
423 2016;39:35–47.
- 424 [31] Mattoo S, Cherry JD. Molecular pathogenesis, epidemiology, and clinical  
425 manifestations of respiratory infections due to *Bordetella pertussis* and other  
426 *Bordetella* subspecies. *Clin Microbiol Rev* 2005;18:326–82.  
427 doi:10.1128/CMR.18.2.326-382.2005.
- 428 [32] Brummelman J, Raeven RHM, Helm K, Pennings JLA, Metz B, van Eden W, et  
429 al. Transcriptome signature for dampened Th2 dominance in acellular pertussis  
430 vaccine-induced CD4<sup>+</sup> T cell responses through TLR4 ligation. *Sci Rep*  
431 2016;6:25064. doi:10.1038/srep25064.
- 432 [33] Li L, Lee H-HH, Bell JJ, Gregg RK, Ellis JS, Gessner A, et al. IL-4 utilizes an  
433 alternative receptor to drive apoptosis of Th1 cells and skews neonatal immunity  
434 toward Th2. *Immunity* 2004;20:429–40. doi:10.1016/S1074-7613(04)00072-X.
- 435 [34] Siegrist CA. The Challenges of Vaccine Responses in Early Life: Selected  
436 Examples. *J Comp Pathol* 2007;137:S4–9. doi:10.1016/j.jcpa.2007.04.004.
- 437 [35] Siegrist CA. Mechanisms by which maternal antibodies influence infant vaccine  
438 responses: Review of hypotheses and definition of main determinants. *Vaccine*  
439 2003;21:3406–12. doi:10.1016/S0264-410X(03)00342-6.
- 440 [36] Lee YC, Newport MJ, Goetghebuer T, Siegrist CA, Weiss HA, Pollard AJ, et al.  
441 Influence of genetic and environmental factors on the immunogenicity of Hib  
442 vaccine in Gambian twins. *Vaccine* 2006;24:5335–40.  
443 doi:10.1016/j.vaccine.2006.04.021.
- 444 [37] Newport MJ, Goetghebuer T, Weiss HA, Whittle H, Siegrist C-A, Marchant A, et  
445 al. Genetic regulation of immune responses to vaccines in early life. *Genes*  
446 *Immun* 2004;5:122–9. doi:10.1038/sj.gene.6364051.

- 447 [38] Tan PL, Jacobson RM, Poland GA, Jacobsen SJ, Pankratz VS. Twin studies of  
448 immunogenicity-determining the genetic contribution to vaccine failure. *Vaccine*  
449 2001;19:2434–9.
- 450 [39] Marcellini V, Piano Mortari E, Fedele G, Gesualdo F, Pandolfi E, Midulla F, et  
451 al. Protection against Pertussis in Humans Correlates to Elevated Serum  
452 Antibodies and Memory B Cells. *Front Immunol* 2017;8:1–11.  
453 doi:10.3389/fimmu.2017.01158.
- 454 [40] Maertens K, Caboré RN, Huygen K, Vermeiren S, Hens N, Van Damme P, et al.  
455 Pertussis vaccination during pregnancy in Belgium: Follow-up of infants until 1  
456 month after the fourth infant pertussis vaccination at 15 months of age. *Vaccine*  
457 2016;34:3613–9. doi:10.1016/j.vaccine.2016.04.066.
- 458 [41] Fallo AA, Neyro SE, Manonelles G V., Lara C, Hozbor D, Zintgraff J, et al.  
459 Prevalence of Pertussis Antibodies in Maternal Blood, Cord Serum, and Infants  
460 From Mothers With and Those Without Tdap Booster Vaccination During  
461 Pregnancy in Argentina. *J Pediatric Infect Dis Soc* 2016:1–7.  
462 doi:10.1093/jpids/piw069.
- 463 [42] van Twillert I. Cellular and humoral immunity after infection with B. pertussis  
464 The role of age, antigen and vaccination history. 2017.  
465  
466  
467  
468  
469  
470  
471

472

473

474

475

476

477

478

479

480 Table 1. Information about the study groups

|                                                              |           | <b>With<br/>Tdap</b> | <b>Without<br/>Tdap</b> |
|--------------------------------------------------------------|-----------|----------------------|-------------------------|
| <b>N (infants)</b>                                           |           | 33                   | 10                      |
| Sex (%)                                                      | Female    | 16 (49%)             | 7 (70%)                 |
|                                                              | Male      | 17 (52%)             | 3 (30%)                 |
| Route of birth (%)                                           | Vaginal   | 14 (42%)             | 6 (60%)                 |
|                                                              | C-section | 20 (58%)             | 4 (40%)                 |
| Exclusive breastfeeding, median (range),<br>months           |           | 6.2 (1.8)            | 5.7 (2.3)               |
| Mother's age at birth, mean (SD), years                      |           | 29.9 (7.8)           | 24.3 (5.2)              |
| Mother's gestational age at vaccination,<br>mean (SD), weeks |           | 29.6 (2.8)           | -                       |
| Mother's gestational age at birth, mean<br>(SD), weeks       |           | 39.1 (1.7)           | 39.6 (1.2)              |
| Time gap between vaccination and birth,<br>mean (SD), weeks  |           | 9.5 (2.8)            | -                       |

|                                                                            |         |         |
|----------------------------------------------------------------------------|---------|---------|
| 1st DTwP dose age<br>(minimum-maximum, days)                               | 21-92   | 62-70   |
| 2nd DTwP dose age<br>(minimum-maximum, days)                               | 99-155  | 122-194 |
| 3rd DTwP dose age<br>(minimum-maximum, days)                               | 182-232 | 183-267 |
| Time gap between 3rd dose and sample<br>collection (minimum-maximum, days) | 10-127  | 7-129   |

481 DTwP: diphtheria, tetanus and whole-cell pertussis vaccine; SD: standard deviation;

482 Tdap: tetanus, diphtheria and acellular pertussis vaccine.

483

484 **Figure 1:** Cytokine expression in PT-stimulated PBMCs from infants born either from  
485 vaccinated (VC) or nonvaccinated (NVC) mothers. (A) Relative gene expression is  
486 similar in children born to Tdap-vaccinated (VC) or nonvaccinated (NVC) mothers  
487 when culturing PMBCs with PT for 120 h. Box represents variation between 25th and  
488 75th percentiles, and whiskers represent minimum and maximum values. (B) VC  
489 presented higher basal expression of *GATA3* and *IFNG* than NVC, though differences  
490 disappear with PT stimulation for 120 h. Box represents variation between the 25th and  
491 75th percentiles, and whiskers represent minimum and maximum values. Statistically  
492 significant differences are indicated.

493

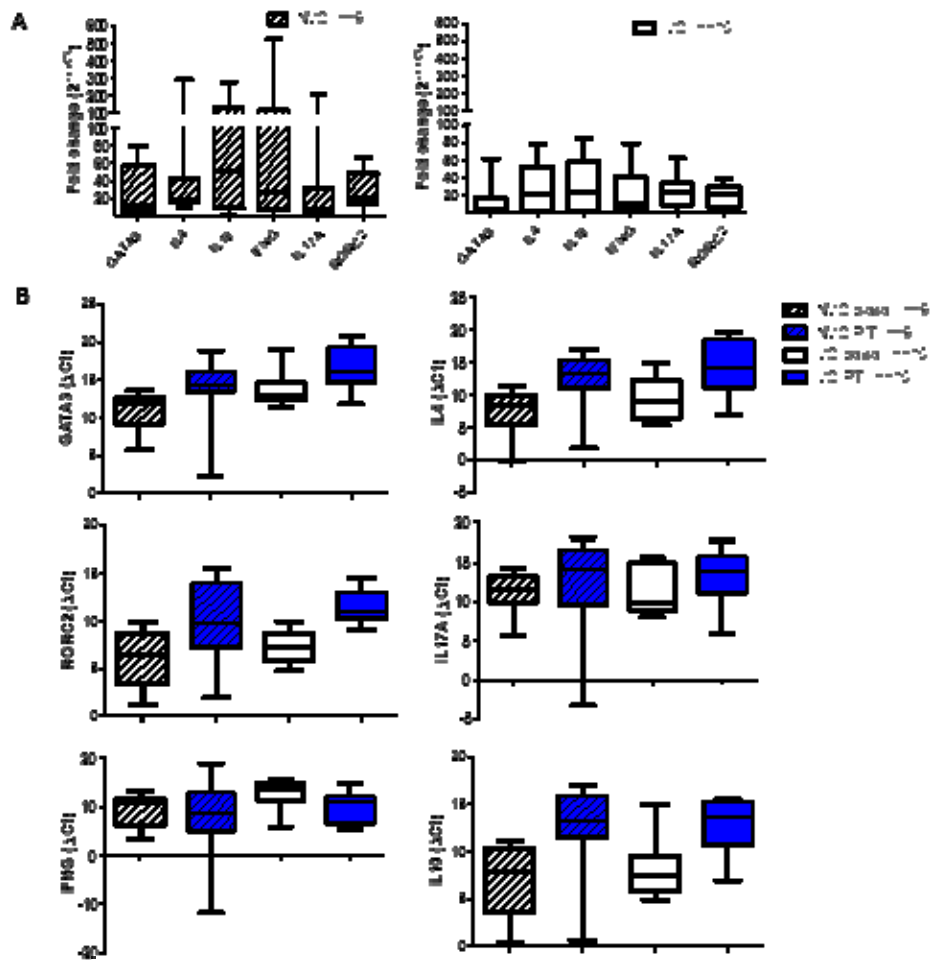

504 Table 2. Cytokine concentration in culture supernatant of peripheral blood mononuclear cells (PBMC) from infants.

| Cytokines<br>(pg/ml) | NV                     |                          |                    |                       | VC                      |               |                       |                       |
|----------------------|------------------------|--------------------------|--------------------|-----------------------|-------------------------|---------------|-----------------------|-----------------------|
|                      | n=2                    | n=2                      | n=10               | n=10                  | n=4                     | n=4           | n=33                  | n=28/33               |
|                      | (-) basal 48h          | (+) PHA                  | (-) basal<br>120h  | PT                    | (-) basal<br>48h        | (+) PHA       | (-) basal<br>120h     | PT                    |
| <b>IL-5</b>          | *                      | *                        | 0(0-0)             | 0(0-0)                | *                       | *             | 0(0-0)                | 3,45(0-<br>96,54)     |
| <b>IL-13</b>         | *                      | *                        | 0(0-0)             | 775,03(0-<br>3360)    | *                       | *             | 0(0-0)                | 725,41(0-<br>5966)    |
| <b>IL-2</b>          | 0(0-0)                 | 102,61(15,53-<br>189,68) | 1,3(0-<br>13,0)    | 430,25(0-<br>2795,84) | 0,81(0-3,24)            | 5,45(0-12,91) | 5,57(0-<br>94,46)     | 206,27-0-<br>4174,33) |
| <b>IL-6</b>          | 29,59(14,95-<br>44,22) | *                        | 182,03(0-<br>1798) | 245,24(0-<br>1167)    | 74,02(49,56-<br>113,11) | *             | 1.969,41(0-<br>20351) | 2098,78(0-<br>17292)  |

|               |                     |                              |                  |                       |                         |                           |                    |                       |
|---------------|---------------------|------------------------------|------------------|-----------------------|-------------------------|---------------------------|--------------------|-----------------------|
| <b>IL-10</b>  | 1,02(0,63-<br>1,41) | 278,64(274,75-<br>282,54)    | 0,01(0-<br>0,1)  | 14,29(0-<br>71,73)    | 0,35(0-0,86)            | 35,42(10,83-<br>57,28)    | 2,03(0-<br>38,31)  | 21,57(0-<br>174,53)   |
| <b>IFN</b>    | 0,05(0,02-<br>0,08) | 2605,14(2058,35-<br>3151,94) | 0,01(0-<br>0,1)  | 799,12(0-<br>2632,72) | 0,04(0-0,08)            | 62,94(0,10-<br>248,88)    | 4,34(0-<br>127,68) | 638,10(0-<br>3633,75) |
| <b>TNF</b>    | 7,42(6,58-<br>8,25) | 2877,63(1809,63-<br>3945,63) | 0(0-0)           | 303,32(0-<br>2292)    | 5,28(1,69-<br>8,25) N=3 | 370,02(105,96-<br>948,70) | 0(0-0)             | 226,90(0-<br>2603)    |
| <b>IL-17A</b> | 3,73(0-7,45)        | 19,80(4,18-<br>35,41)        | 0,67(0-<br>6,68) | 3,85(0-<br>13,86)     | 0(0-0)                  | 5,94(0-23,76)             | 1,40(0-<br>8,58)   | 7,47(0-<br>32,02)     |
| <b>IL-4</b>   | 0,85(0,58-<br>1,12) | 3,6(1,52-5,68)               | 0,55(0-<br>1,19) | 1,1(0-<br>2,48)       | 0,63(0-1,31)            | 1,04(0-1,9)               | 0,79(0-<br>1,45)   | 1,48(0-<br>5,5)       |
| <b>IL-21</b>  | *                   | *                            | 0(0-0)           | 0(0-0)                | *                       | *                         | 0,66(0-<br>6,55)   | 1,045(0-<br>6,99)     |
| <b>IL-22</b>  | *                   | *                            | 0(0-0)           | 0,954(0-<br>9,54)     | *                       | *                         | 0,18(0-<br>5,91)   | 0(0-0)                |

505 PBMC were stimulated *in vitro* with 2  $\mu$ L/mL PHA (+) or 5  $\mu$ g/mL pertussis toxin (PT), or left unstimulated (-) for 48 h and 120 h respectively,  
506 and the supernatants collected to measure cytokine concentrations by flow cytometry. Values are presented as mean (minimum-maximum). \*  
507 Samples were not available for IL-5, IL-13, IL-21 and IL-22 quantification after PHA stimulation. NVC: children born from unvaccinated  
508 women; VC: children born from Tdap-vaccinated women; pg/mL, picogram/milliliter.
